CORRECTION

## Correction: Efficacy and safety of the ayurvedic formulation '*Trikatu*' as an add-on to standard care in dyslipidemia: Study protocol for a randomized, double-blind, placebo-controlled trial evaluating lipid parameters, and gut microbiota

Shruti Khanduri, Sophia Jameela, Suchanda Sahu, Sujata Devi, Bhogavalli Chandra Sekhara Rao, Kshirod Ratha, Richa Singhal, Latika Kaushik, Narayanam Srikanth, Rabinarayan Acharya

There is an error in affiliation 7 for author Rabinarayan Acharya. The correct affiliation 7 is: Director General, Central Council for Research in Ayurvedic Sciences, Ministry of Ayush, New Delhi, India.

### Reference

1. Khanduri S, Jameela S, Sahu S, Devi S, Rao BCS, Ratha K, et al. Efficacy and safety of the ayurvedic formulation "*Trikatu*" as an add-on to standard care in dyslipidemia: Study protocol for a randomized, double-blind, placebo-controlled trial evaluating lipid parameters, and gut microbiota. PLoS One. 2026;21(5):e0348058. <https://doi.org/10.1371/journal.pone.0348058> PMID: [42113738](https://pubmed.ncbi.nlm.nih.gov/42113738/)

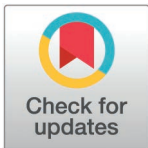

### OPEN ACCESS

**Citation:** Khanduri S, Jameela S, Sahu S, Devi S, Rao BCS, Ratha K, et al. (2026) Correction: Efficacy and safety of the ayurvedic formulation '*Trikatu*' as an add-on to standard care in dyslipidemia: Study protocol for a randomized, double-blind, placebo-controlled trial evaluating lipid parameters, and gut microbiota. PLoS One 21(6): e0351663. <https://doi.org/10.1371/journal.pone.0351663>

**Published:** June 12, 2026

**Copyright:** © 2026 Khanduri et al. This is an open access article distributed under the terms of the [Creative Commons Attribution License](https://creativecommons.org/licenses/by/4.0/), which permits unrestricted use, distribution, and reproduction in any medium, provided the original author and source are credited.
